# Supplementary material for: MicroRNA-210 induces apoptosis in colorectal cancer via induction of reactive oxygen
Source: Springer Nature journal article supplement (doi:10.1186/s12935-016-0321-6), 2016-06-10
Supplement: MOESM1 [file 10244368]

# Supplemental Figure S1

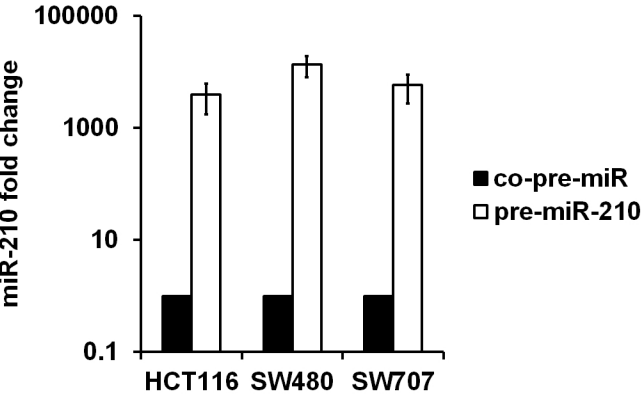

**Supplemental figure S1.** CRC cell lines were transfected with pre-miR-210 and a control miRNA, respectively. 48 h thereafter, total RNA including miRNA was isolated. Expression of miR-210 was measured by qRT-PCR analysis and normalized to internal U47 snoRNA expression (mean  $\pm$  SEM; n=3).
