# Supplementary material for: MicroRNA-210 induces apoptosis in colorectal cancer via induction of reactive oxygen
Source: Springer Nature journal article supplement (doi:10.1186/s12935-016-0321-6), 2016-06-10
Supplement: MOESM2 [file 10244368]

# Supplemental Figure S2

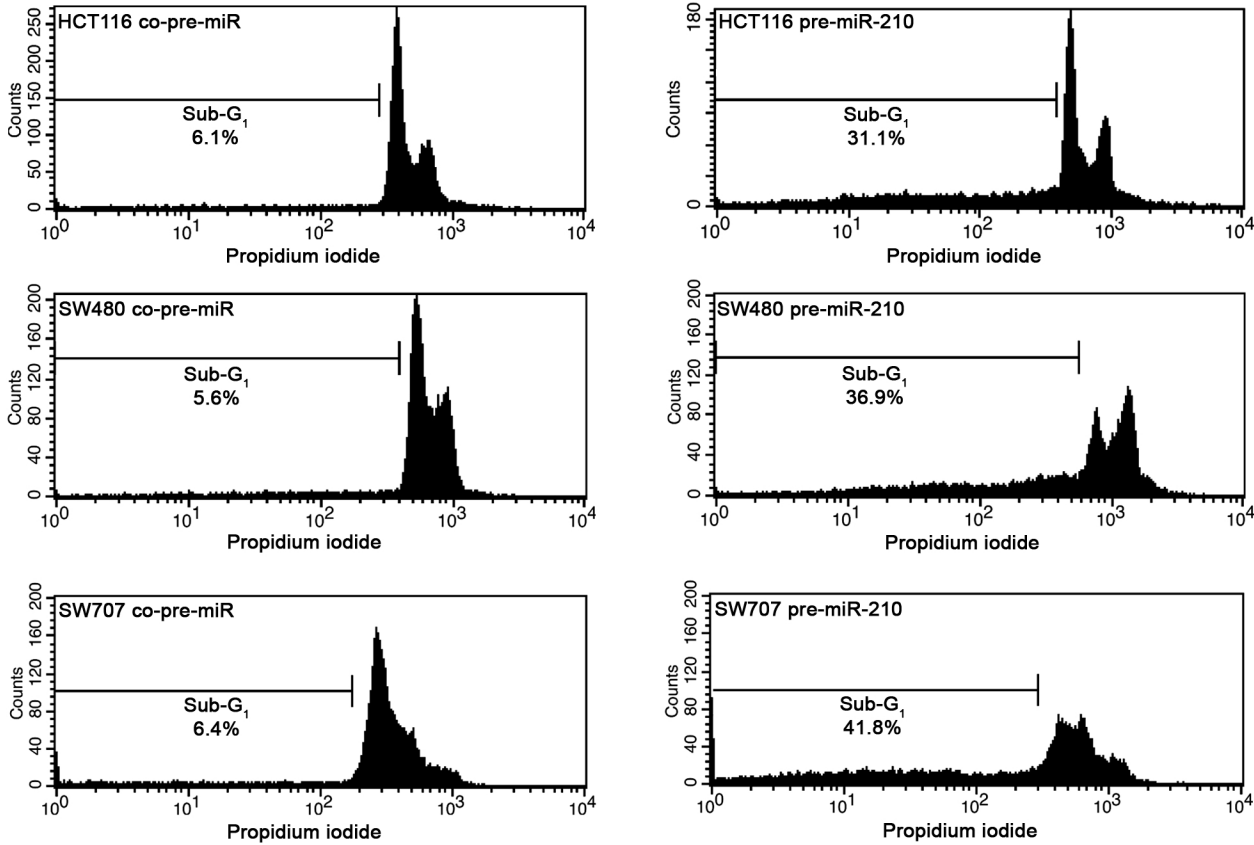

**Supplemental Figure S2.** Representative flow cytometric histograms of CRC cell lines 72 h post transfection with pre-miR-210 and a control miRNA, respectively. Cells were stained with by PI staining and subjected to FACS analysis.
