# Supplementary material for: MicroRNA-210 induces apoptosis in colorectal cancer via induction of reactive oxygen
Source: Springer Nature journal article supplement (doi:10.1186/s12935-016-0321-6), 2016-06-10
Supplement: MOESM3 [file 10244368]

# Supplemental Figure S3

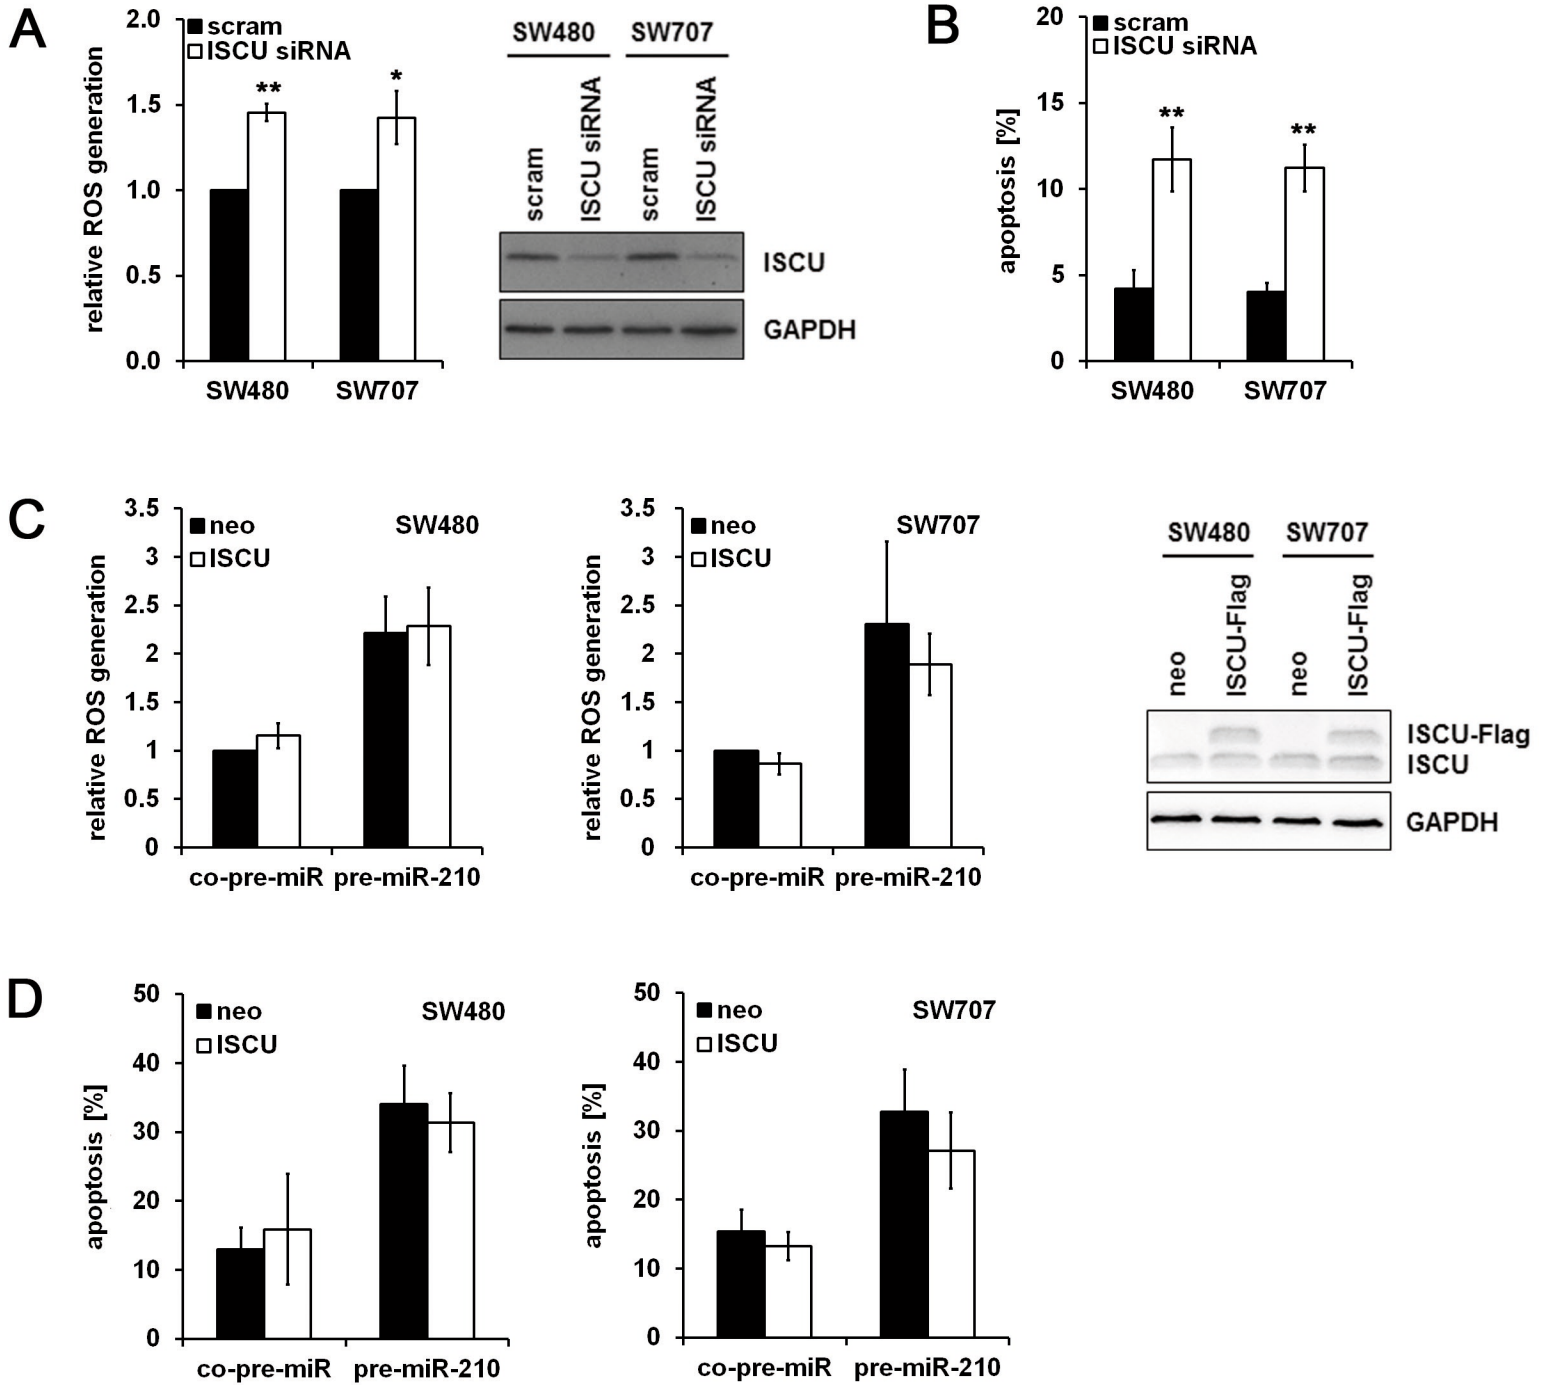

**Supplemental Figure S3.** **A** CRC cell lines were transfected with an ISCU specific siRNA and a control siRNA, respectively. ROS generation was measured 48 h after transfection (left panel; mean  $\pm$  SEM; n=3; \* p < 0.05; \*\* p < 0.01; student's t-test). Successful knockdown of ISCUs was monitored by immunoblot analysis. Lysates were generated 48 h after transfection (right panel). **B** Cells were transfected as described in A. The percentage of apoptotic cells was determined 72 h post transfection by PI staining and FACS analysis. Data indicate the percentage of cells showing a sub-G1-DNA content (mean  $\pm$  SEM; n=3; \*\* p < 0.01; student's t-test). **C** CRC cell lines stably overexpressing ISCUs or an empty vector control (neo) were transfected with pre-miR-210 and a control miRNA, respectively. Measurement of ROS generation was performed 48 h thereafter (left panel; mean  $\pm$  SEM; n=3). Successful overexpression of ISCUs-Flag was monitored by immunoblot analysis. **D** Cells were transfected as described in C. The percentage of apoptotic cells was determined by PI staining and FACS analysis (mean  $\pm$  SEM; n=3)
